# Supplementary material for: Prediction of Honeydew Contaminations on Cotton Samples by In-Line UV Hyperspectral Imaging
Source: MDPI journal article supplement (doi:10.3390/s23010319), 2022-12-28
Supplement: s1 [file s1]

Supplementary Material

# Prediction of Honeydew Contaminations on Cotton Samples by In-Line UV Hyperspectral Imaging

Mohammad Al Ktash<sup>1,2,†</sup>, Mona Stefanakis<sup>1,2,†</sup>, Frank Wackenhut<sup>1</sup>, Volker Jehle<sup>3</sup>, Edwin Ostertag<sup>1</sup>, Karsten Rebner<sup>1</sup>, Marc Brecht<sup>1,2,\*</sup>

<sup>1</sup> Center of Process Analysis and Technology (PA&T), School of Applied Chemistry, Reutlingen University, Alteburgstraße 150, 72762 Reutlingen, Germany

<sup>2</sup> Institute of Physical and Theoretical Chemistry, Eberhard Karls University Tübingen, Auf der Morgenstelle 18, 72076 Tübingen, Germany

<sup>3</sup> Texoversum Faculty Textile, Reutlingen University, Alteburgstraße 150, 72762 Reutlingen, Germany

\* Correspondence: author: marc.brecht@reutlingen-university.de

† These authors contributed equally to the work.

## Supplementary Materials:

### *S1.1 Cotton sample preparation*

All details and measured values of the reference sample set are given in Table S1.

**Citation:** Al Ktash, M.; Stefanakis, M.; Wackenhut, F.; Jehle, V.; Ostertag, E.; Rebner, K.; Brecht, M. Prediction of Honeydew Contaminations on Cotton Samples by In-Line UV Hyperspectral Imaging. *Sensors* **2023**, *23*, 319.  
<https://doi.org/10.3390/s23010319>

Academic Editor: Hui-liang Shen

Received: 7 November 2022

Revised: 6 December 2022

Accepted: 13 December 2022

Published: 28 December 2022

**Publisher's Note:** MDPI stays neutral with regard to jurisdictional claims in published maps and institutional affiliations.

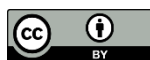

**Copyright:** © 2022 by the authors. Licensee MDPI, Basel, Switzerland. This article is an open access article distributed under the terms and conditions of the Creative Commons Attribution (CC BY) license (<https://creativecommons.org/licenses/by/4.0/>).

**Table S1.** Description of the cotton sample preparation.

| Sample type | Sugar concentration / wt % | Cotton weight / g ( $\pm 0.0001$ g) | Cotton weight / g after dried at 30 °C, 8 h ( $\pm 0.0001$ g) | Humidity / % after dried at 30 °C, 8 h | Soaked cotton weight / g after dried at 30 °C, 44 h ( $\pm 0.0001$ g) | Humidity / % after dried at 30 °C, 44 h | Amount of sugar on cotton / g | Ratio of sugar / g dried cotton / g |
|-------------|----------------------------|-------------------------------------|---------------------------------------------------------------|----------------------------------------|-----------------------------------------------------------------------|-----------------------------------------|-------------------------------|-------------------------------------|
| A1          | 2                          | 0.3                                 | 0.2879                                                        | 53.7                                   | 0.3734                                                                | 50.0                                    | 0.0855                        | 0.2970                              |
| A2          | 2                          | 0.3                                 | 0.2925                                                        | 53.5                                   | 0.3643                                                                | 50.0                                    | 0.0718                        | 0.2455                              |
| A3          | 2                          | 0.3                                 | 0.2914                                                        | 53.3                                   | 0.3600                                                                | 50.0                                    | 0.0686                        | 0.2354                              |
| B1          | 1                          | 0.3                                 | 0.2917                                                        | 54.2                                   | 0.3295                                                                | 50.0                                    | 0.0378                        | 0.1296                              |
| B2          | 1                          | 0.3                                 | 0.2931                                                        | 54.7                                   | 0.3291                                                                | 50.0                                    | 0.0360                        | 0.1228                              |
| B3          | 1                          | 0.3                                 | 0.2913                                                        | 54.2                                   | 0.3341                                                                | 50.0                                    | 0.0428                        | 0.1469                              |
| C1          | 0.5                        | 0.3                                 | 0.2916                                                        | 55.2                                   | 0.3142                                                                | 50.0                                    | 0.0226                        | 0.0775                              |
| C2          | 0.5                        | 0.3                                 | 0.2929                                                        | 55.6                                   | 0.3137                                                                | 50.0                                    | 0.0208                        | 0.0710                              |
| C3          | 0.5                        | 0.3                                 | 0.2992                                                        | 55.7                                   | 0.3215                                                                | 50.0                                    | 0.0223                        | 0.0745                              |
| D1          | 0.25                       | 0.3                                 | 0.2925                                                        | 56.0                                   | 0.3050                                                                | 51.0                                    | 0.0125                        | 0.0427                              |
| D2          | 0.25                       | 0.3                                 | 0.2928                                                        | 56.2                                   | 0.3030                                                                | 51.0                                    | 0.0102                        | 0.0348                              |
| D3          | 0.25                       | 0.3                                 | 0.2921                                                        | 56.2                                   | 0.3033                                                                | 51.0                                    | 0.0112                        | 0.0383                              |
| E1          | 0.125                      | 0.3                                 | 0.2908                                                        | 56.5                                   | 0.2979                                                                | 50.5                                    | 0.0071                        | 0.0244                              |
| E2          | 0.125                      | 0.3                                 | 0.2819                                                        | 56.9                                   | 0.2915                                                                | 50.0                                    | 0.0096                        | 0.0341                              |
| E3          | 0.125                      | 0.3                                 | 0.2899                                                        | 57.2                                   | 0.3013                                                                | 49.9                                    | 0.0114                        | 0.0393                              |
| F1          | 0.0625                     | 0.3                                 | 0.2903                                                        | 57.4                                   | 0.2997                                                                | 50.7                                    | 0.0094                        | 0.0324                              |
| F2          | 0.0625                     | 0.3                                 | 0.2899                                                        | 57.6                                   | 0.2990                                                                | 49.9                                    | 0.0091                        | 0.0314                              |
| F3          | 0.0625                     | 0.3                                 | 0.2823                                                        | 57.7                                   | 0.2915                                                                | 49.7                                    | 0.0093                        | 0.0328                              |
| CLN1        | 0                          | 0.3                                 | 0.2984                                                        | 57.7                                   | -                                                                     | -                                       | -                             | -                                   |
| CLN2        | 0                          | 0.3                                 | 0.2991                                                        | 57.9                                   | -                                                                     | -                                       | -                             | -                                   |
| CLN3        | 0                          | 0.3                                 | 0.2894                                                        | 58.1                                   | -                                                                     | -                                       | -                             | -                                   |

### S1.2 Additional figures of the principal component analysis of the sugar cotton samples

For the PCA model of the cotton samples with different concentrations of sugar four PCs are necessary. The variance on PC3 is not necessary to distinguish between different sugar concentrations. The information on PC3 might be related to the morphology of the fiber itself. PC1 against PC2, PC3 and PC4 are shown respectively in Figure S1 to complement the PCA sugar model.

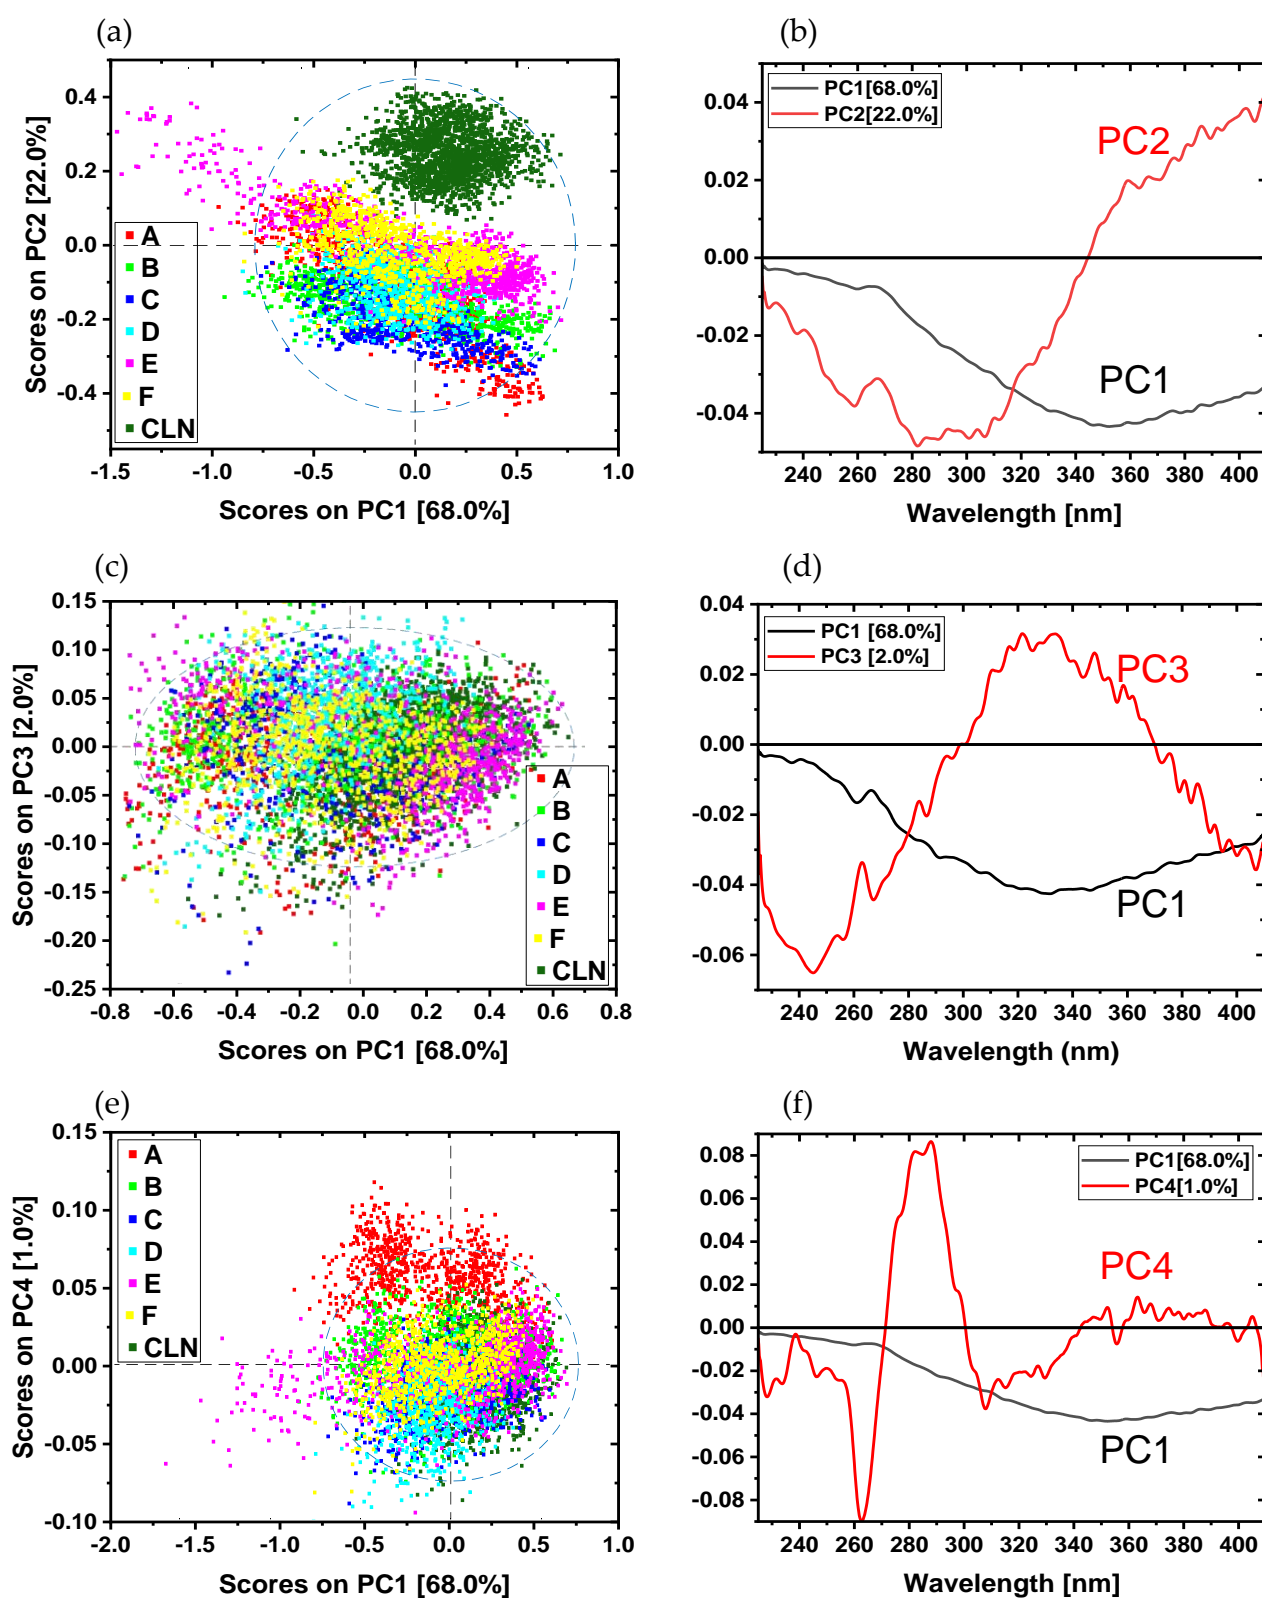

**Figure S1.** PCA sugar model for the cotton samples with (a,c,e) scores and (b,d,f) corresponding loadings (PC1 black, PC2, PC3 and PC4 red).

### S1.3 Pure dried protein spectrum

Protein spectra were acquired to identify the information in the range of 250 nm to 280 nm. The protein was solved in distilled water and the solution was dropped on a piece of PTFE. Afterwards, the sample was dried in a vacuum oven (see 2.2). Data was acquired with the hyperspectral imaging setup with the settings mentioned in 2.3 and 2.4. This experiment was necessary to verify the spectral range between 250 nm and 280 nm contains true information and is not an artifact due to the efficiency of the detector and the weak intensity light source in the UV range [1].

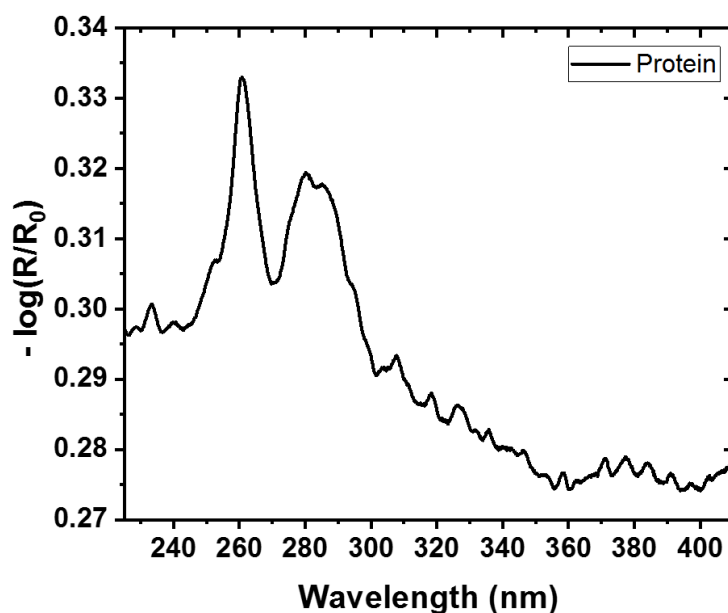

Figure S2. Mean spectrum of pure dried protein on PTFE.

### S1.3 X-loadings weights and x-loadings of the PLS-R model

For model building and understanding the PLS-R factor loadings and loading weights for all five factors are displayed in the Figure S3.

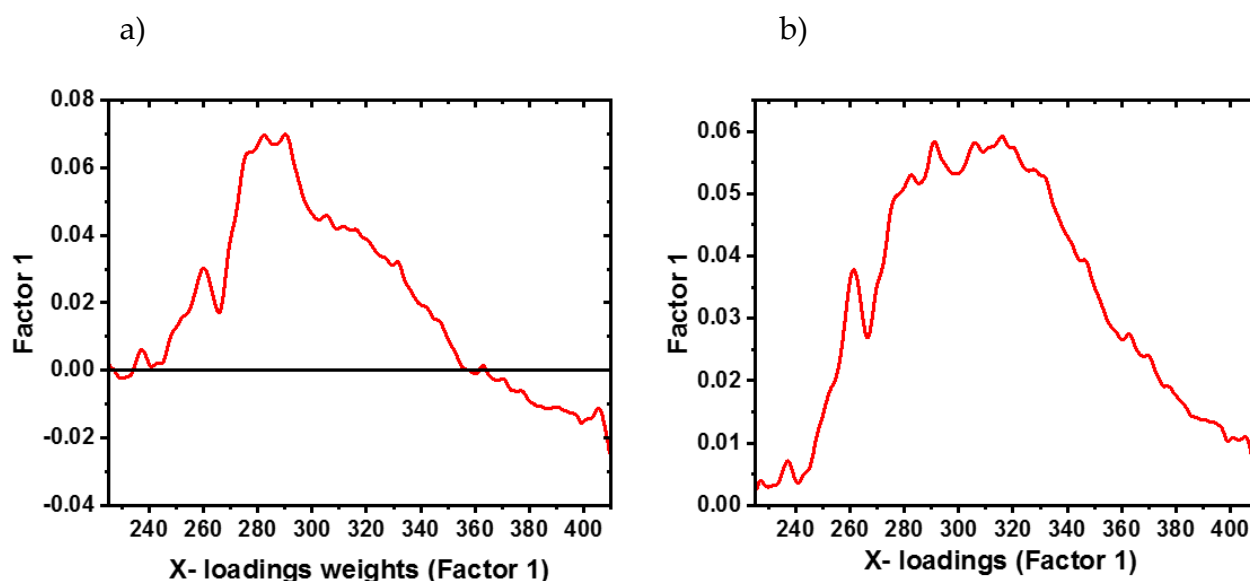

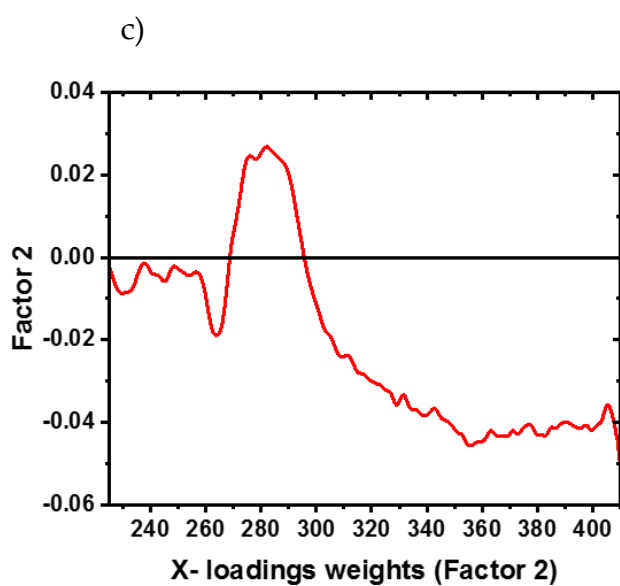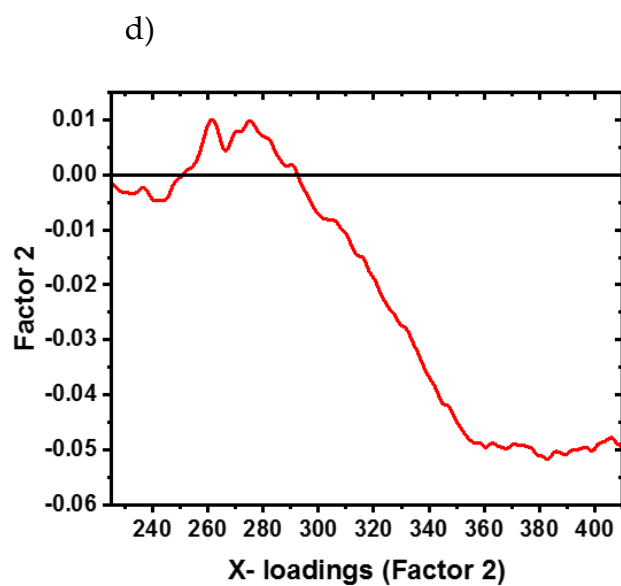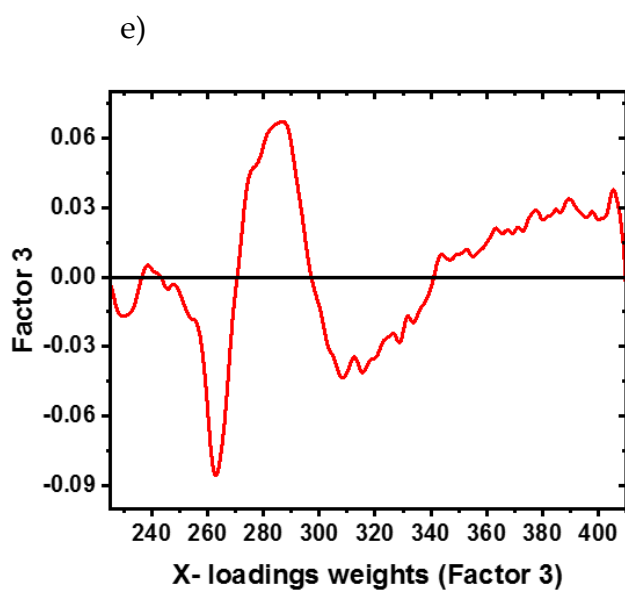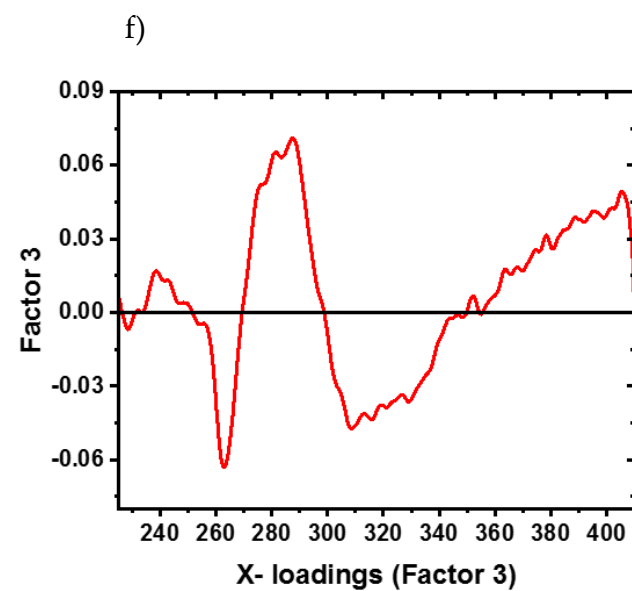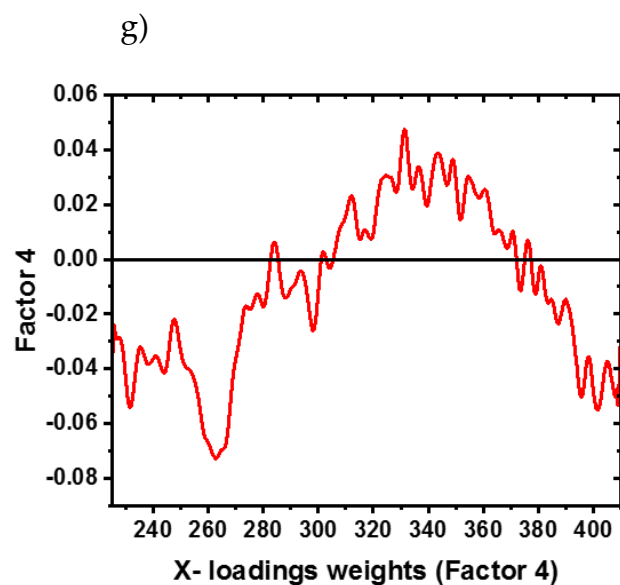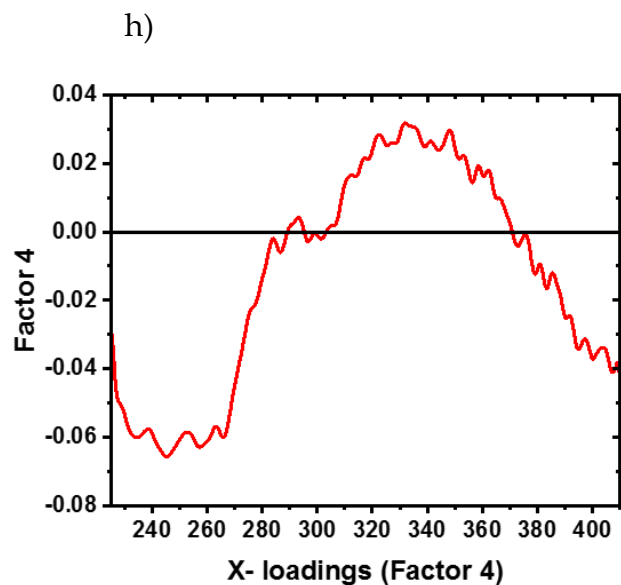

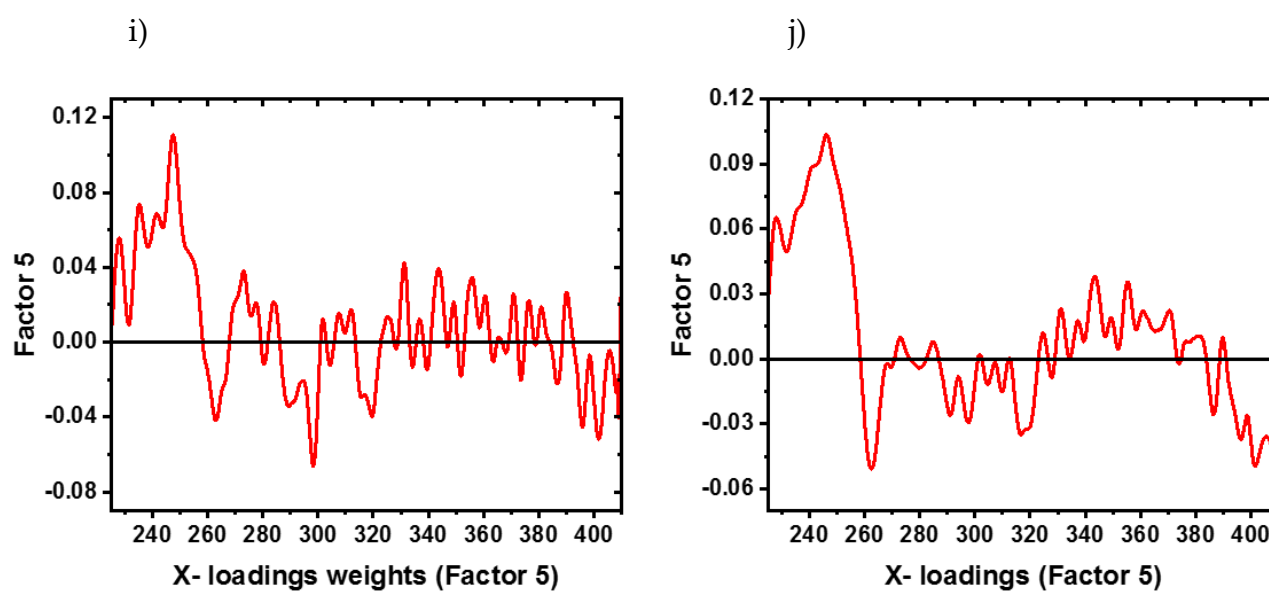

**Figure S3.** X-loadings weights and x-loadings for factor 1 (a, b), factor 2 (c, d), factor 3 (e, f), factor 4 (g, h) and factor 5 (i, j), respectively.

#### S1.4 References

1. Al Ktash, M.; Stefanakis, M.; Boldrini, B.; Ostertag, E.; Brecht, M. Characterization of pharmaceutical tablets using UV hyperspectral imaging as a rapid in-line analysis tool. *Sensors* **2021**, *21*, 4436, doi:10.3390/s21134436.
